# Supplementary material for: Emerging investigator series: impacts of aeration flow rates and bubble sizes on PFOA/PFOS removal in electrocoagulation
Source: Royal Society of Chemistry journal article supplement (doi:10.1039/d3ew00208j), 2023-01-01
Supplement: d3ew00208j1.pdf [file d3ew00208j1.pdf]

## Electronic Supplementary Information

### Impacts of aeration flow rates and bubble sizes on PFOA/PFOS removal in electrocoagulation

Tianhong Mu and Kyoung-Yeol Kim\*

Department of Environmental and Sustainable Engineering, University at Albany, State University of  
New York, 1400 Washington Avenue, Albany, New York 12222, USA

(A)

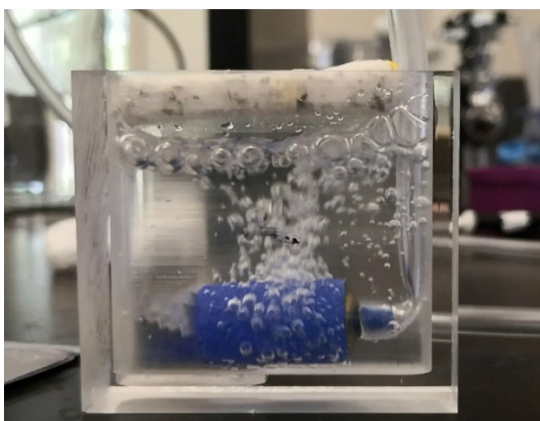

(B)

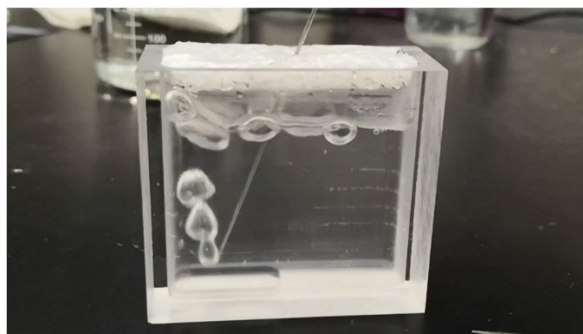

**Figure S1.** Aeration (airflow rate: 9.4 mL/sec) diffused by (A) an air stone to generate fine bubbles, and (B) a syringe needle to generate coarse bubbles.

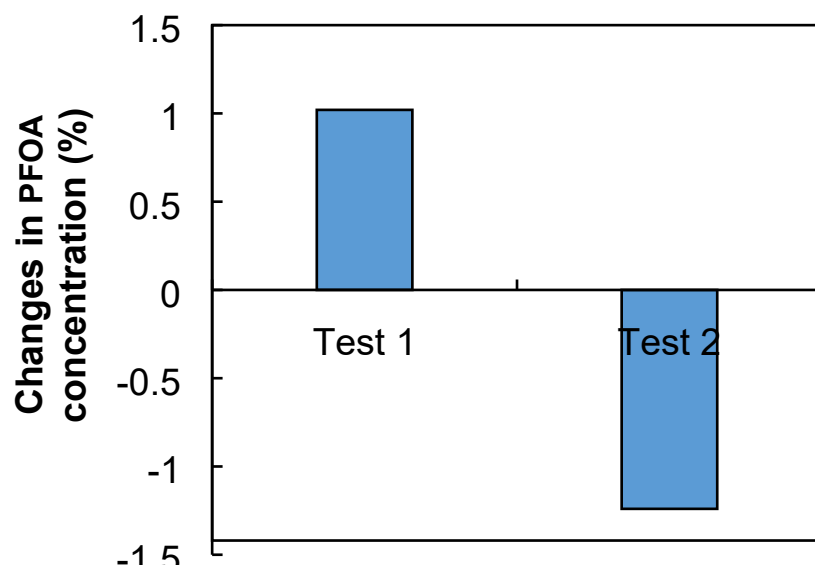

**Figure S2.** The duplicate test results of the control test (for an hour) without aeration and electrical input (initial concentration:  $0.1\mu\text{M}$ , initial pH: 3.5). Each column shows changes in PFOA concentration in a single test.

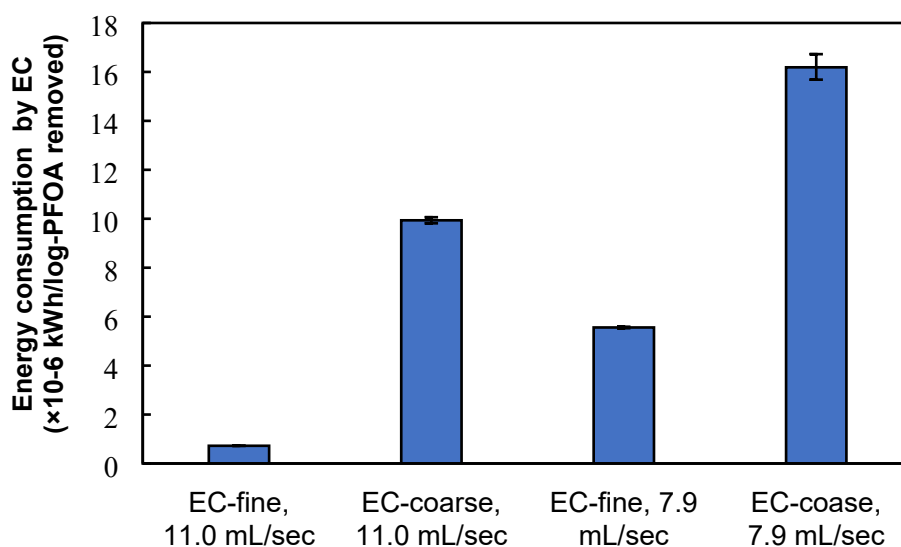

**Figure S3.** The estimated total energy consumptions (electrical + aeration) for PFOA removal (initial concentration:  $0.01\mu\text{M}$ ; initial pH: 3.5) by EC-fine and EC-coarse with a low airflow rate (7.9 mL/sec) and a high airflow rate (11.0 mL/sec). The error bars indicate mean  $\pm$  standard deviation values ( $n = 3$ ).

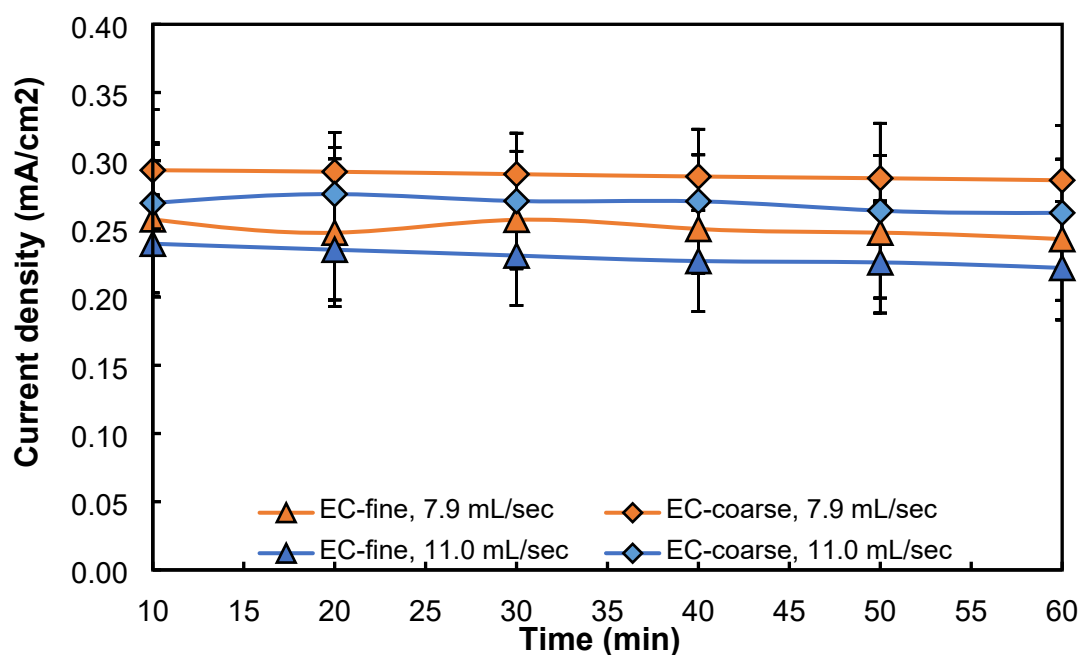

**Figure S4.** Current generation by EC-fine and EC-coarse with airflow rates of 7.9 mL/sec and 11.0 mL/sec. The error bars indicate mean $\pm$ standard deviation values (n=216).

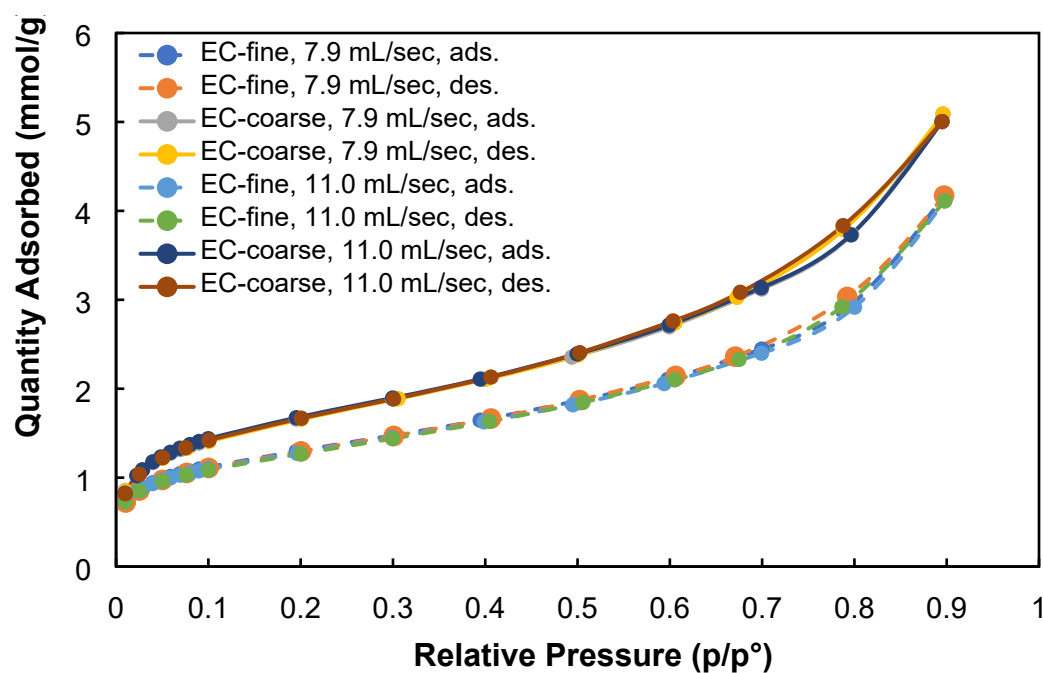

**Figure S5.** The BET nitrogen adsorption (ads.) and desorption (des.) isotherm curves for dry floc generated by EC-fine and EC-coarse aerated with low (7.9 mL/sec) and high (11.0 mL/sec) airflow rates.

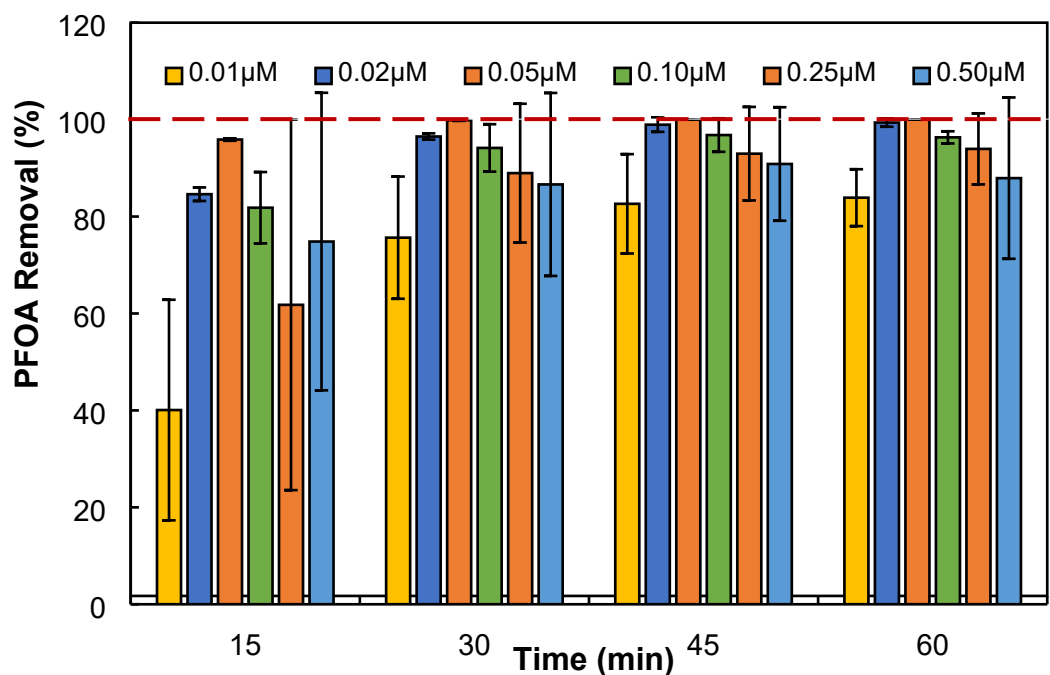

**Figure S6.** PFOA (initial concentration 0.01, 0.02, 0.05, 0.10, 0.25, and 0.50  $\mu\text{M}$ ; initial pH: 3.5) removal using EC-fine with an airflow rate of 9.4 mL/sec. The red dot line indicates 100% removal of PFOA. The error bars indicate mean $\pm$ standard deviation values ( $n = 3$ ).

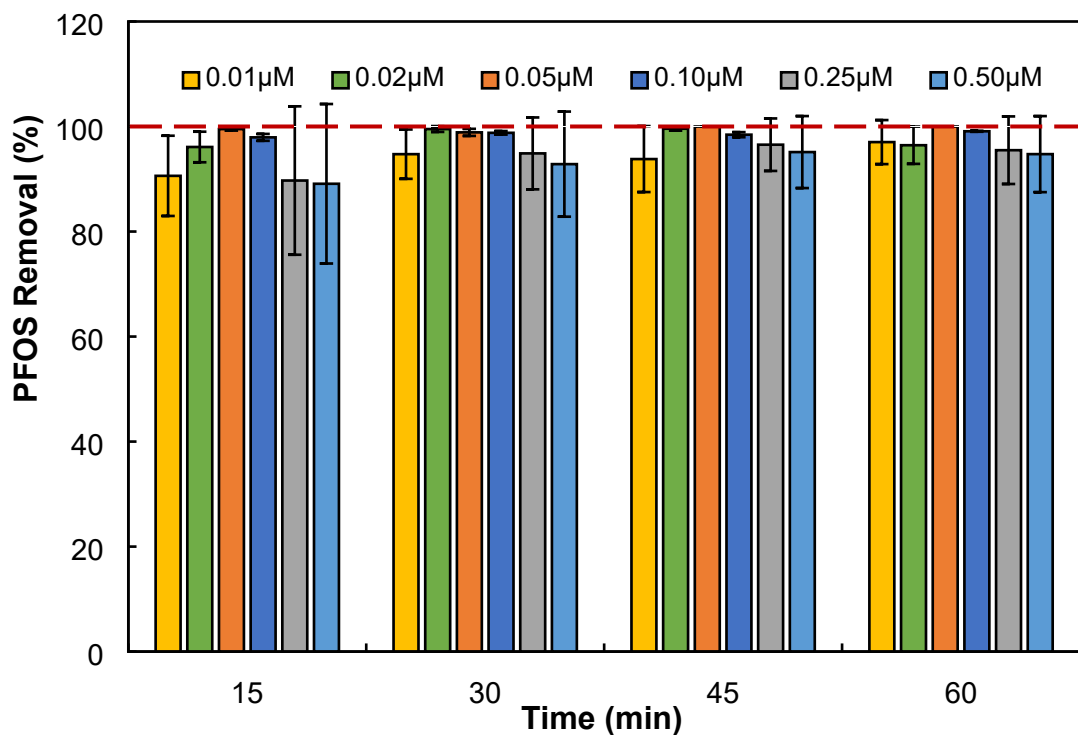

**Figure S7.** PFOS (initial concentration 0.01, 0.02, 0.05, 0.10, 0.25, and 0.50  $\mu\text{M}$ ; initial pH: 3.5) removal using EC-fine with an airflow rate of 9.4 mL/sec. The red dot line indicates 100% removal of PFOA. The error bars indicate mean $\pm$ standard deviation values ( $n = 3$ ).

**Table S1.** Dilution factors of PFOA/PFOS (with different initial concentrations) sampling for LC/MS test.

| <b>Initial concentrations (μM)</b> | <b>Dilution factors</b> |
|------------------------------------|-------------------------|
| 0.01                               | 10                      |
| 0.02                               | 20                      |
| 0.05                               | 50                      |
| 0.10                               | 100                     |
| 0.25                               | 200                     |
| 0.50                               | 400                     |
